# Supplementary material for: Template- and surfactant-free synthesis of ultrathin CeO2 nanowires in a mixed solvent and their superior adsorption capability for water treatment
Source: PubMed Central journal article supplement — Chem Sci. 2015 Feb 16;6(4):2511–5. doi: 10.1039/c5sc00104h (PMC5489027; doi:10.1039/c5sc00104h), 2015-02-16
Supplement: SC-006-C5SC00104H-s001.pdf [file SC-006-C5SC00104H-s001.pdf]

Electronic Supplementary Material (ESI) for Chemical Science.  
This journal is © The Royal Society of Chemistry 2014

## Supplementary Information

### Template- and surfactant-free synthesis of ultrathin CeO<sub>2</sub> nanowires in mixed solvent and their superior adsorption capability for water treatment<sup>†</sup>

Xiao-Fang Yu<sup>a‡</sup>, Jian-Wei Liu<sup>a‡</sup>, Huai-Ping Cong<sup>a</sup>, Lei Xue<sup>a</sup>, Muhammad Nadeem Arshad<sup>b,c</sup>, Hassan A. Albar<sup>c</sup>, Tariq R. Sobahi<sup>c</sup>, Qiang Gao<sup>a</sup>, and Shu-Hong Yu<sup>\*a</sup>

<sup>a</sup>*Division of Nanomaterials and Chemistry, Hefei National Laboratory for Physical Sciences at Microscale, Department of Chemistry, University of Science and Technology of China, Hefei, Anhui, 230026, P. R. China*  
E-mail: [shyu@ustc.edu.cn](mailto:shyu@ustc.edu.cn)

<sup>b</sup>*Center of Excellence for Advanced Materials Research, Chemistry Department, Faculty of Science, King Abdulaziz University, Jeddah 21589, Saudi Arabia.*

<sup>c</sup>*Chemistry Department, Faculty of Science, King Abdulaziz University, Jeddah 21589, Saudi Arabia.*

\*Corresponding authors: [shyu@ustc.edu.cn](mailto:shyu@ustc.edu.cn)

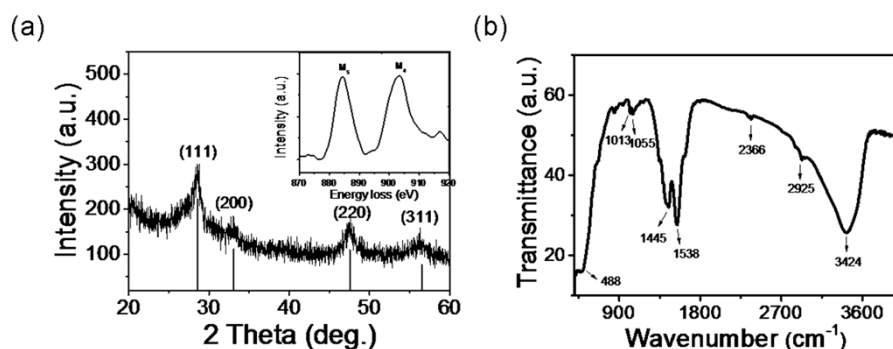

**Fig. S1** a) X-ray diffraction (XRD) pattern of as-synthesized nanowires and Ce  $M_{4,5}$ -edge EELS spectra of  $\text{CeO}_2$  nanowires (inset), which corresponded to valence states of  $\text{Ce}^{4+}$ ; b) FT-IR spectrum of as-synthesized  $\text{CeO}_2$  nanowires.

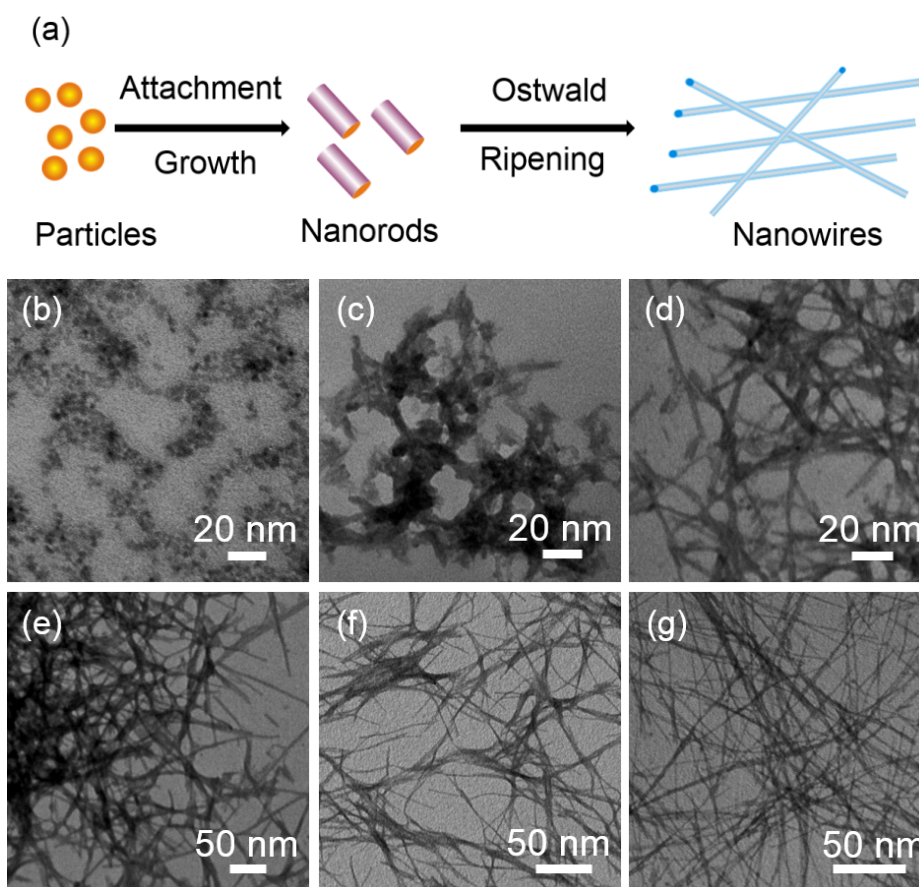

**Fig. S2** a) Schematic diagram of ultrathin  $\text{CeO}_2$  nanowires formation by attached growth followed by Ostwald ripening; b-g) TEM of as-synthesized ceria nanowires with different reaction times, from b to g the reaction time is a) before dropping  $\text{NH}_3 \cdot \text{H}_2\text{O}$ , b-f) after dropping  $\text{NH}_3 \cdot \text{H}_2\text{O}$  for 0, 1, 3, 6 and 12 h.

**Table S1** Summary of maximum adsorption capacities ( $Q_m$ ) for Congo Red on various adsorbents.

| Type of adsorbent                          | $Q_m$ (mg/g) | Reference     |
|--------------------------------------------|--------------|---------------|
| Mesoporous $Fe_2O_3$                       | 53           | 1             |
| $MnO_2$ hierarchical hollow nanostructures | 80           | 2             |
| $TiO_2$                                    | 31.7         | 3             |
| Hierarchical hollow $FeOOH$                | 275          | 4             |
| Hierarchical $MgO$                         | 2409         | 5             |
| NiO nanospheres                            | 440          | 6             |
| Hierarchical hollow structure $ZnO$        | 97           | 7             |
| $CeO_2$ nanowire arrays                    | 987          | 8             |
| Hierarchical $CeO_2$ nanospheres           | 942.7        | 9             |
| Ultrathin $CeO_2$ NWs                      | 2382.75      | Present study |

**Table S2** Summary of maximum adsorption capacities of NMOs (nanosize metal oxides) for heavy metal ions.

| NMOs               | Pb                 | Cu                 | Cr                  | Cd                  |
|--------------------|--------------------|--------------------|---------------------|---------------------|
| $TiO_2$            | 81.3 <sup>10</sup> |                    | 9.93 <sup>11</sup>  | 15.2 <sup>10</sup>  |
| $ZrO_2$            |                    |                    | 17.17 <sup>11</sup> |                     |
| 30Zr70Ti oxide     |                    |                    | 29.46 <sup>11</sup> |                     |
| Modified $Al_2O_3$ | 100 <sup>12</sup>  |                    | 100 <sup>12</sup>   | 83.33 <sup>12</sup> |
| $ZnO$              | 6.7 <sup>13</sup>  | 1600 <sup>14</sup> | 5.11 <sup>15</sup>  |                     |
| $W_{18}O_{49}$     | 192 <sup>16</sup>  |                    |                     |                     |
| Commercial $CeO_2$ |                    | 0.37 <sup>17</sup> |                     |                     |
| $CeO_2$            | 9.2 <sup>18</sup>  | 15.4 <sup>18</sup> | 5.8 <sup>17</sup>   |                     |
| Present study      | 641.7              | 518                | 28.5                | 222                 |

## Notes and references

1. C. C. Yu, X. P. Dong, L. M. Guo, J. T. Li, F. Qin, L. X. Zhang, J. L. Shi, D. S. Yan, *J. Phys. Chem. C*, 2008, **112**, 13378–13382.
2. J. B. Fei, X. H. Yan, W. Qi, Y. Yang, K. W. Wang, Q. He, J. B. Li, *Adv. Mater.*, 2008, **20**, 452-456.
3. M. L. de Souza, *RSC Adv.*, 2014, **4**, 23351-23358.
4. B. Wang, L. Yu, R. Xu, T.-T. Lim, X. W. D. Lou, *Adv. Mater.*, 2012, **24**, 1111-1116.
5. P. Tian, G. Ning, H. Fang, J. Ye, W. Gong, Y. Lin, *ACS Appl. Mater. Inter.*, 2013, **5**, 12411-12418.
6. C. T. Zhu, X. W. Lou, *J. Phys. Chem. C*, 2012, **116**, 6873-6878.
7. S. Lan, R. Q. Li, Z. H. Leng, and S. C. Gan, *Ind. Eng. Chem. Res.*, 2014, **53**, 3131-3139.
8. X. H. Lu, D. Z. Zheng, J. Y. Gan, Z. Q. Liu, C. L. Liang, P. Liu, Y. X. Tong, *J. Mater. Chem.*, 2010, **20**, 7118-7122.
9. X. W. Ouyang, W. Li, S. L. Xie, T. Zhai, M. H. Yu, J. Y. Gan, X. H. Lu, *New J. Chem.*, 2013, **37**, 585-588.
10. K. E. Engates, *Environ. Sci. Pollut. Res.*, 2011, **18**, 386-395.
11. H. L. Lin, C. Y. Wu and R. K. Chiang, *J Colloid Interf. Sci.*, 2010, **341**, 12-17.
12. A. Afkhami, H. Bagheri, *J. Hazard. Mater.*, 2010, **181**, 836-844.
13. X. F. Ma, M. J. Gao, H. Z. Xu, G. A. Li, *Catal. Today*, 2010, **158**, 459-463.
14. X. B. Wang, Y. X. Lin, G. Z. Wang, C. H. Liang, *J. Mater. Chem.*, 2010, **20**, 8582-8590.
15. X. W. Zhao, L. Qi, *Nanotechnology*, 2012, **23**, 235604.
16. X. Q. Gao, F. Xiao, C. Yang, J. D. Wang and X. T. Su, *J. Mater. Chem. A*, 2013, **1**, 5831-5834.
17. L. S. Zhong, A. M. Cao, Q. Liu, W. G. Song, L. J. Wan, *Chem. Mater.*, 2007, **19**, 1648-1655.
18. C. Y. Cao, C. Q. Chen, W. G. Song, W. Cai, *J. Phys. Chem. C*, 2010, **114**, 9865–9870.
